# Supplementary material for: Implementation of Q learning and deep Q network for controlling a self balancing robot model
Source: Robotics Biomim. 2018 Dec 21;5(1):8. doi: 10.1186/s40638-018-0091-9 (PMC6302870; doi:10.1186/s40638-018-0091-9)
Supplement: Supplementary file 1 — Additional file 1. PID1:Performance Values of PID with Kp 100, Ki 0.5, Kd 0.1. [file 40638_2018_91_MOESM1_ESM.csv]

0.11722662582749255	0.012381730029302582
0.1645070678812277	0.01640885674320218
0.277866102600844	0.0004694483299784863
0.2791125061126085	-0.011140800382109128
0.3798528425050893	0.010462966121933717
0.5145657976608815	0.001326074560014004
0.47642940268916867	-0.009147691992767243
0.6467530202919649	0.004287810037187381
0.7126007301013273	-0.0010836068370236734
0.9049021827569128	-0.0003716383238064752
1.0938427294334636	-0.0003528306158718242
1.2827865844139603	-0.00036483975919684997
1.4717172061786712	-0.00025358149748314074
1.6606676777670606	-0.0003272243433275479
1.8496082244436105	-0.000308416635392883
2.038538846208322	-0.0001971583736791599
2.2274760845809265	-0.00014753381448481817
2.4164100146495837	-0.00006709240403078576
2.60535386963008	-0.00007910154735581154
2.7942911080026844	-0.00002947698816146982
2.9832316546792343	-0.00001066928022681879
3.172168893051838	0.00003895527896753681
3.3611160563362814	-0.000003870715617193543
3.5500499864049386	0.00007657069483685275
3.7390004579933276	0.000002927848992431703
3.9279509295817174	-0.00007071499685197546
4.116901401170106	-0.00014435784269636875
4.305851872758495	-0.0002180006885407898
4.494799036042937	-0.0002608266831255063
4.683739582719489	-0.00024201897519085525
4.8726966709157695	-0.0003772955235546299
5.061637217592319	-0.0003584878156199789
5.250587689180709	-0.00043213066146438606
5.43951831094542	-0.00032087239975066295
5.628462165925916	-0.0003328815430757026
5.817396095994575	-0.0002524401326216563
6.006336642671125	-0.0002336324246870053
6.195273881043729	-0.00018400786549266357
6.38421442772028	-0.00016520015755799866
6.573151666092883	-0.00011557559836365694
6.7620955210733795	-0.00012758474168868272
6.951036067749929	-0.00010877703375404557
7.139983231034374	-0.00015160302833874817
7.328933702622762	-0.00022524587418315534
7.51788417421115	-0.0002988887200275764
7.706831337495594	-0.000341714714612279
7.895778500780035	-0.00038454070919700933
8.084728972368426	-0.0004581835550414165
8.213635381483632	-0.0012213844631708548
