# Supplementary material for: Implementation of Q learning and deep Q network for controlling a self balancing robot model
Source: Robotics Biomim. 2018 Dec 21;5(1):8. doi: 10.1186/s40638-018-0091-9 (PMC6302870; doi:10.1186/s40638-018-0091-9)
Supplement: Supplementary file 3 — Additional file 3. FuzzyPD+I: Performance Values of Fuzzy PD+ I control system. [file 40638_2018_91_MOESM3_ESM.csv]

0.12010518766435585	0.012212047174187834
0.21649533827396616	0.015850998050953233
0.3280325125508009	0.005279475927405186
0.3128854888835765	-0.00254622956387833
0.30600047812574716	-0.009431910069835847
0.30600047812574716	-0.017333640345520915
0.30600047812574716	-0.022575382211569434
0.40239062873535747	0.0163475325694927
0.48042075065742307	0.005614651378159613
0.5056657901027971	-0.004630443879558535
0.5056657901027971	-0.015505102377778593
0.6158259622280661	0.010015566328519188
0.6089409514702367	0.017838057028787366
0.7246091322017693	-0.00004522261617170842
0.7218551278986375	-0.011999925317768223
0.7191011235955057	-0.017195128060758888
0.815491274205116	0.0148170325187965
0.815491274205116	0.020684654010641845
0.9302414535022715	0.006201853049553285
0.9084389194358119	-0.005119318153881794
0.9153239301936412	-0.01442827296541746
1.0082715754243368	0.016018686238549698
1.0936457088214202	0.0018236760481458864
1.1046617260339473	-0.009158903989080966
1.1046617260339473	-0.015261230340600132
1.2079368874013867	0.012761952246692715
1.2079368874013867	0.021524267007848444
1.2630169734640213	-0.0008428926368501816
1.3571121204876886	-0.00962624865169999
1.3754721491752333	-0.014491522304273738
1.4420272531675833	-0.0051979298404285085
1.526024384413101	-0.019518316880430153
1.5085823571599337	-0.029597523898646366
1.5177623715037059	-0.03867143897644412
1.607267511355487	-0.007207927691653265
1.7036576619650972	-0.019867925403347156
1.7036576619650972	-0.032072578106385474
1.7036576619650972	-0.04052195305464279
1.8585704040162567	-0.007210376458246959
1.848242887879513	-0.001148674516628534
2.006598135309587	0.008888505806543545
2.006598135309587	0.02062374879023425
2.006598135309587	0.02789959944012249
2.0869232608175956	-0.00562539658324801
2.1718383934974903	-0.012320349565999214
2.321013626583792	-0.0006885156933015835
2.295768587138418	0.0065054163886569955
2.288883576380589	0.01411928054699288
2.302653597896247	0.022674978010600907
2.405928759263687	-0.00912550030118732
2.5023189098732974	0.004736151130259783
2.495433899115468	0.015359453155968802
2.5023189098732974	0.024686064202533983
2.605594071240737	-0.005654028315728282
2.605594071240737	-0.011599884760798249
2.7185082476691376	0.005565692789988669
2.710246234759743	0.018770547347671196
2.7019842218503474	0.0262798973106025
2.805259383217787	-0.006876653523745543
2.9085345445852266	0.0030742548686636118
2.911288548888358	0.016421539737658072
2.9016495338273973	0.02646550126062812
3.0049246951948367	-0.007786338918864377
3.101314845804447	0.004275908588416796
3.111642361941191	0.009206217574855347
3.1095768587138424	0.021332333938011386
3.101314845804447	0.028215804275145834
3.202295003585944	-0.005254021246164711
3.2321300502032044	-0.01369904283158875
3.3181926846760708	-0.022448799815340856
3.321635190054985	-0.03421483446922527
3.304422663160412	-0.04349601147714413
3.3078651685393266	-0.051136456264317676
3.4088453263208227	-0.010126606315804573
3.4386803729380833	0.0036992554500421965
3.530480516375808	0.01122320592216812
3.5144154912742054	0.021156700863244227
3.5075304805163765	0.02843154689094017
3.5970356203681573	-0.003318784029749569
3.610805641883816	-0.011922619640071491
3.6245756633994746	-0.02083939506329184
3.7127038010996896	-0.027022744194619225
3.6762132440831947	-0.037808845246588896
3.704441788190295	-0.047302449617067505
3.7967009323452072	-0.011269615215082823
3.8242409753765245	0.0010955258831738812
3.9068611044704764	0.010808715549332354
3.9068611044704764	0.02293513329914608
3.9068611044704764	0.030523923761932734
3.9757112120487696	0.00017880813270901297
4.0032512550800865	-0.008423018233228344
4.030791298111404	-0.01812013394431017
4.117542433660053	-0.028340607586465616
4.092756394931867	-0.03808708373459527
4.111116423619412	-0.047107502680653585
4.193736552713363	-0.01449755003742749
4.221276595744681	-0.00020261342629719625
4.306191728424576	0.011649333168731235
4.299306717666747	0.020880053027042295
4.31651924456132	0.028471355045309676
4.388811857518528	0.00023908546424643295
4.409466889792015	-0.010084914494824515
4.430121922065504	-0.0174359862313605
4.502414535022711	-0.028143626290112272
4.4874970117140816	-0.03531734035045103
4.502414535022711	-0.043555912075359415
4.505857040401626	-0.047936567144841125
4.581592158737749	-0.016318595197985647
4.606837198183122	-0.0055706446737682075
4.6366722448003825	0.006377578214688054
4.735357398995936	0.01395468994448934
4.715161367439637	0.02388236644870176
4.7124073631365055	0.03220616362292279
4.795027492230457	0.0023324669574312784
4.808797513746116	-0.005645489027093831
4.822567535261775	-0.01377991491806814
4.905187664355726	-0.02080900524197507
4.913449677265121	-0.03323151026741156
4.905187664355726	-0.04412302130290727
4.994692804207507	-0.0067136535730464575
5.022232847238825	0.0053385477123118336
5.104852976332776	0.0149735024252457
5.104852976332776	0.026708745408936405
5.104852976332776	0.03461047568462147
5.187473105426728	0.0017638507965949818
5.215013148458045	-0.010593253324123406
5.304518288309826	-0.020281327435474616
5.312780301219221	-0.032484774591882204
5.304518288309826	-0.042812993964160745
5.394023428161607	-0.006029505860096776
5.419268467606981	0.004874914570569863
5.504183600286876	0.015814120044644567
5.504183600286876	0.027705832934784486
5.504183600286876	0.03623344283626641
5.5868037293808275	0.00307387813534149
5.614343772412145	-0.008813816266029256
5.722208940951471	-0.01761254858165552
5.700406406885011	-0.028125291935102992
5.703848912263926	-0.037747688870633206
5.703848912263926	-0.04338060550280476
5.793354052115707	-0.006284177585842363
5.8208940951470245	0.005924493605965128
5.903514224240976	0.017202382336615696
5.903514224240976	0.0290940952267556
5.903514224240976	0.0373870002685637
5.986134353334927	0.004696845286986412
6.013674396366245	-0.007660258833731948
6.103179536218026	-0.01797421257088
6.103179536218026	-0.030022395367469146
6.103179536218026	-0.040192939286667756
6.192684676069807	-0.004661210434197427
6.220224719101124	0.007547460757610064
6.302844848195076	0.018981819394709817
6.306975854649773	0.029997903582049554
6.302844848195076	0.038853497513759425
6.385464977289027	0.0063198124386313476
6.413005020320345	-0.0057243518691886125
6.502510160172126	-0.017055359998256525
6.502510160172126	-0.028712368028722624
6.505952665551041	-0.038334764964252865
6.592015300023907	-0.005228821972841441
6.619555343055224	0.005258680248024741
6.69070045421946	0.01632626806642254
6.715945493664835	0.025770302703563244
6.715945493664835	0.03781848550015237
6.798565622758787	0.007631849021762449
6.819220655032274	-0.001596861592164045
6.832990676547933	-0.010357167108935195
6.939708343294287	-0.016600391722923075
6.892660769782454	-0.02609976429915574
6.908725794884055	-0.035616006156367314
7.005115945493666	-0.004229725202608767
7.018885967009324	0.004221658990033128
7.025770977767154	0.01032498996374459
7.09003107817356	0.019409621011593436
7.119407124073632	0.02999127307558043
7.108391106861106	0.04058789401023254
7.191011235955058	0.012539679586648478
7.2047812574707155	0.0040923138827757555
7.218551278986375	-0.00372917219530014
7.282811379392781	-0.012690737024593446
7.308056418838156	-0.022101326114582473
7.3057614152522135	-0.031046523973993045
7.321826440353814	-0.03641631331030054
7.390676547932108	-0.004486406172738933
7.418216590963425	0.005531686328779636
7.48936170212766	0.016860057324592795
7.514606741573035	0.02698212822301338
7.512311737987092	0.03824762661329236
7.5972268706669865	0.0072789754767204895
7.617881902940475	-0.004296783733944154
7.682142003346881	-0.011902276040677617
7.707387042792256	-0.02086953372906057
7.714272053550085	-0.03351129754796439
7.790007171886208	-0.004741077898484519
7.817547214917525	0.00605936413528009
7.88869232608176	0.018065771392373142
7.913937365527135	0.027744510889187668
7.911642361941192	0.03799295488754678
7.900167344011477	0.0447194864945423
7.9965574946210864	0.012500750476697228
8.017212526894575	0.004523799114364416
8.076882620129096	-0.005690194714650765
8.099832655988527	-0.015257588585153081
8.090652641644754	-0.020604983218424133
8.108094668897921	-0.030074083179262495
8.099832655988527	-0.034581622031630455
8.189337795840308	-0.001866351495245902
8.214582835285682	0.009663948561217564
8.275400430313173	0.0210690475769669
8.311890987329669	0.03035303752702416
8.292612957207746	0.03877873687894982
8.306382978723406	0.04503954238130278
8.389003107817357	0.014592122725497494
8.402773129333015	0.005362407489378718
8.423428161606504	-0.002458073966504881
8.485393258426967	-0.013141142640803585
8.499163279942627	-0.02067576722372258
8.506048290700456	-0.02998472203525826
