# Supplementary material for: Implementation of Q learning and deep Q network for controlling a self balancing robot model
Source: Robotics Biomim. 2018 Dec 21;5(1):8. doi: 10.1186/s40638-018-0091-9 (PMC6302870; doi:10.1186/s40638-018-0091-9)
Supplement: Supplementary file 5 — Additional file 5. LQ2R2: Performance values of LQR control system with Q 100 and R 1000. [file 40638_2018_91_MOESM5_ESM.csv]

0.30748905181171315	0.03457789979409742
0.32903540061519787	0.032848318462594395
0.34834493421921253	0.025353466026081017
0.36787948754600613	0.01641729581331497
0.38655374143573096	0.009671928620452963
0.40127452253416157	0.004021962937542867
0.41821509668253576	-0.002484557309540225
0.4372829943270413	0.005520933424845498
0.45175043346467303	0.01209334248455729
0.46949225328522026	0.01935758407687027
0.487008411778891	0.02765957446808509
0.5004289363447989	0.03342484557309533
0.5160866951169345	0.0370487302676733
0.5355188143854622	0.02904323953328758
0.553239186297606	0.022816746739876437
0.5636012757882838	0.02074124914207276
0.5840443536111508	0.011352093342484548
0.5998515406682067	0.002753603294440632
0.6185110638516105	-0.0010020590253946304
0.6390475016176498	0.007481125600549032
0.6545184095638292	0.016129032258064502
0.6693037177029264	0.022470830473575787
0.6860908306263388	0.029735072065888768
0.7013765899615146	0.03630748112560056
0.7187175774425967	0.036554564172958104
0.7374094688980233	0.028647906657515376
0.7640952236503128	0.024200411805078925
0.8022780000720169	0.02074124914207276
0.8336414415141857	0.017282086479066594
0.85613608117383	0.011516815374056244
0.8731674619429475	0.0008510638297871687
0.888706471581194	-0.004856554564172999
0.9099677124740713	-0.014344543582704206
0.9259801866544166	-0.022498284145504477
0.9394777037120289	-0.039794097460535416
0.9568514260960465	-0.0352971859986273
0.9672234146213717	-0.031146190803019946
0.9902308138005986	-0.02076870281400134
1.0020295203354674	-0.013850377487989007
1.029657451064048	-0.00779684282772819
1.0474028455359958	0.0017158544955387933
1.0582047088066708	0.004598490048043913
1.0736719504437215	0.010940288263555198
1.0895072895173021	0.02004941660947157
1.1043800391291207	0.024200411805078925
1.122460900886352	0.030253946465339743
1.1357709778897553	0.03803706245710359
