# Supplementary material for: Implementation of Q learning and deep Q network for controlling a self balancing robot model
Source: Robotics Biomim. 2018 Dec 21;5(1):8. doi: 10.1186/s40638-018-0091-9 (PMC6302870; doi:10.1186/s40638-018-0091-9)
Supplement: Supplementary file 6 — Additional file 6. PID2: Performance values of PID control system Kp 50, Ki 0.8 and kd 0.05. [file 40638_2018_91_MOESM6_ESM.csv]

0.1606808510638298	0.013473728433268856
0.25676255319148944	0.004241215319148908
0.35284425531914887	-0.004000195280464233
0.5038297872340425	-0.0010701323017408282
0.673116595744681	-0.0018874246808510825
0.815605106382979	-0.0008201293617021432
0.9587472340425534	-0.001259298723404259
1.1214978723404256	-0.000854884332688613
1.2793463829787235	-0.0007121395744681125
1.4626859574468087	-0.0009393123404255466
1.6080068085106387	-0.00003832851063832743
1.7048510638297876	-0.0011227744680851193
1.9244663829787234	-0.00061405617021279
2.0932956595744683	-0.000259840680851095
2.2784000000000004	0.0001842553191489238
2.452915744680851	-0.0006801123404255455
2.6016136170212762	-0.0003412527659574782
2.7222876595744685	0.0002915353191489112
2.9333242553191496	-0.00003339357833657963
3.036268936170213	0.00005122382978721418
3.2352953191489364	-0.00009551133462284978
3.3622604255319155	-0.0002576102127659907
3.537266382978724	-0.00013325771760157312
3.663545191489362	-0.000509738893617051
3.841982638297873	-0.0001031074042553426
3.96551625531915	-0.0005474852765957744
4.1412085106382985	-0.00016000773694392623
4.280428936170214	-0.0007553600000000382
4.447754893617022	-0.00009542468085110833
4.618871829787235	-0.0011653249361702478
4.754758808510639	-0.00010997038297874684
4.896136170212767	-0.001092748936170243
5.056729872340426	-0.00009409974468088667
5.1981072340425545	-0.0011304953191489664
5.362818723404256	-0.0000689952804642513
5.500078297872341	-0.0011682417021276897
5.666162382978725	-0.00011666178723405973
5.802049361702129	-0.001205988085106413
5.968285957446809	0.000012381276595710422
6.145198297872342	-0.0014633497872340584
6.279026382978724	-0.0000860357446808846
6.447169361702128	-0.0015010961702127817
6.57756595744681	-0.00012335319148940038
6.817770212765959	-0.000640806189555157
6.920714893617022	-0.0004343319148936431
7.119741276595747	-0.0006298098259187868
7.2295489361702145	-0.0006337872340425876
7.414849361702128	-0.0007105668085106709
7.556226723404256	-0.0011035581276596096
7.716820425531916	-0.0006946961702127968
7.833491063829788	-0.00092374808510641
8.058596765957448	-0.00036209906382980717
8.19232680851064	-0.001627325957446829
