# Supplementary material for: Implementation of Q learning and deep Q network for controlling a self balancing robot model
Source: Robotics Biomim. 2018 Dec 21;5(1):8. doi: 10.1186/s40638-018-0091-9 (PMC6302870; doi:10.1186/s40638-018-0091-9)
Supplement: Supplementary file 7 — Additional file 7. PID3: Performance values of PID control system Kp 25, Ki 0.8 and kd 0.1. [file 40638_2018_91_MOESM7_ESM.csv]

0.17056599934326	0.01644673734954359
0.28053818364306493	0.018203483578505694
0.35024484846544945	0.010198956132471668
0.39904695574837334	0.004526242296954405
0.4547508318560498	-0.0013030756739655924
0.5614533781943543	-0.0075958180139309855
0.7309167365049114	-0.008456433340981173
0.8818883738333669	-0.0037970224732660762
1.0422902098051985	-0.0014755838853557496
1.176185645292522	-0.0002348114931169376
1.3249124018355563	-0.0003331598984082501
1.4850564844761647	0.00010762186766151427
1.6635201421621484	0.0009264429197997359
1.8132109857869287	0.0003974241398438383
1.9812972638987763	0.0006098785888840608
2.1463409336621417	0.00014912507576943235
2.3186749289746547	0.0004964495186337847
2.4855993093087	0.0008434344459137127
2.691203774224423	0.0004909864042298984
2.836738672739843	0.0008077853095493359
2.998557973286297	0.0006064217029335822
3.153438809889278	0.0009045781161629157
3.3304889853199526	0.0008387738228911867
3.4494991430660944	0.000859062451148182
3.6353931850534273	0.0008707294412310801
3.7632664142781733	0.0007890193572467064
3.9383340244628418	0.000867308564509256
4.072122712592342	0.0006545711858153558
4.260926300254666	0.0010510019282084643
4.390017944598945	0.0006129897862395123
4.56783192721106	0.0007625988717680082
4.718685217325698	0.0004003048781359153
4.870513568763195	0.001343084098981956
5.020680694452265	0.0006525711303725645
5.199701294874716	0.0005561240123540395
5.346338075786852	0.0006864702182245164
5.487501453944055	0.0004934247434271177
5.721568642020541	0.0007100202537621975
5.847780988441896	0.0008301110313128912
6.007287467673859	0.0007952540979788286
6.188732826670151	0.0010181615116788556
6.409084613971067	0.0007243262058876376
6.529841870902343	0.0009626538001310803
6.710039458684126	0.0008970470431993727
6.914637722867832	0.0007560554805045999
7.079819256535174	0.0013048361251440932
7.243165348376428	0.0006228419111983935
7.396560547088784	0.0010170503697662092
7.491040532387874	0.0004845664731790017
7.817535179730347	0.0009665551428466312
7.965070133688549	0.0009758146587854205
8.110644127937931	0.0009272639302129876
8.231080594083684	0.0014059346066692124
