# Supplementary material for: Implementation of Q learning and deep Q network for controlling a self balancing robot model
Source: Robotics Biomim. 2018 Dec 21;5(1):8. doi: 10.1186/s40638-018-0091-9 (PMC6302870; doi:10.1186/s40638-018-0091-9)
Supplement: Supplementary file 8 — Additional file 8. P1: Performance values of P control system Kp 50000. [file 40638_2018_91_MOESM8_ESM.csv]

0.16281899104777708	0.013193937761672742
0.2602083089262963	0.0038567196337193493
0.3574902273274527	-0.004476850378277816
0.5086409065383637	-0.0014905859021129841
0.6785574436094777	-0.002296795044438471
0.8213857951693737	-0.00119795313762458
0.9650330991842897	-0.0016245623485052624
1.1282601830939436	-0.0011944274416668815
1.2865978240523184	-0.0010298949636412813
1.4705481024330376	-0.0012367357931591938
1.6162358707573365	-0.00030595206032858757
1.7135072252754733	-0.0013918664152976212
1.9337694681694049	-0.0008489092378130975
2.103100061862382	-0.00046883921357394887
2.2887480065485066	0.00000430918394828117
2.4639152965222615	-0.0008489092378130975
2.6130517953708257	-0.0004869377861567714
2.7340430287234256	0.0001691354699703551
2.9457894614184235	-0.00013319295840169554
3.049054058902844	-0.00003447347158633263
3.248732575733668	-0.0001578728301055432
3.376121120578039	-0.00030595206032858757
3.551673049078157	-0.0001578728301055432
3.678396333389388	-0.0005231349313224026
3.8573601320076656	-0.00008876918933478639
3.9813368067338772	-0.0005231349313224026
4.157548713825626	-0.00010851308669784787
4.297278703648065	-0.00069377861567467
4.4650680435765935	-0.000004309183948308926
4.636847932235835	-0.0010660921088069125
4.773054942527642	0.000019822246162121138
4.914990746580816	-0.000957500673310005
5.075989605736471	0.00007411796391056102
5.2179312199253065	-0.000957500673310005
5.3830542190116955	0.0001382856303405594
5.520871693269795	-0.000957500673310005
5.687372750896053	0.00012841368165902867
5.823812166614285	-0.000957500673310005
5.990448148501994	0.0002973336924319836
6.168085945048393	-0.0011746835443038062
6.302192591298889	0.00023700511715592232
6.471026418392883	-0.0011746835443038062
6.601690559264464	0.00023700511715592232
6.842718755203586	-0.0002565923169209061
6.945970147834233	-0.00003447347158633263
7.145653946606567	-0.00020723257351322466
7.255813062343531	-0.00019736062483169392
7.441714162940585	-0.0002516563425801477
7.583586055501492	-0.0006317263668192963
7.7446488261494135	-0.00019736062483169392
7.861717249575154	-0.0004145434958254812
8.087481690939688	0.00018270939940748243
8.221776336579772	-0.0010816051710207525
